# Supplementary material
Source: PubMed Central journal article supplement (PMC169961)

## Supplementary Material

### Figure Legend

Figure S1. 1D imino proton spectrum of TT/AA-10 duplex at different ratio of RPA-A. 0.5 mM of TT/AA-10 was dissolved in a 90% H<sub>2</sub>O and 10% D<sub>2</sub>O containing 20 mM Tris-HCl, 100 mM NaCl, 2 mM DTT, pH 7.0. All spectrum were taken at 4 °C with water suppression. Aliquots of 1.5 mM RPA-A, dissolved in the same buffer used for the TT/AA-10 duplex samples, were added directly to the NMR cell, and the samples were allowed to equilibrate for several minutes. Molar ratios of RPA-A to dsDNA (dsDNA:RPA-A) are marked at the right side of each spectra.

Figure S1.

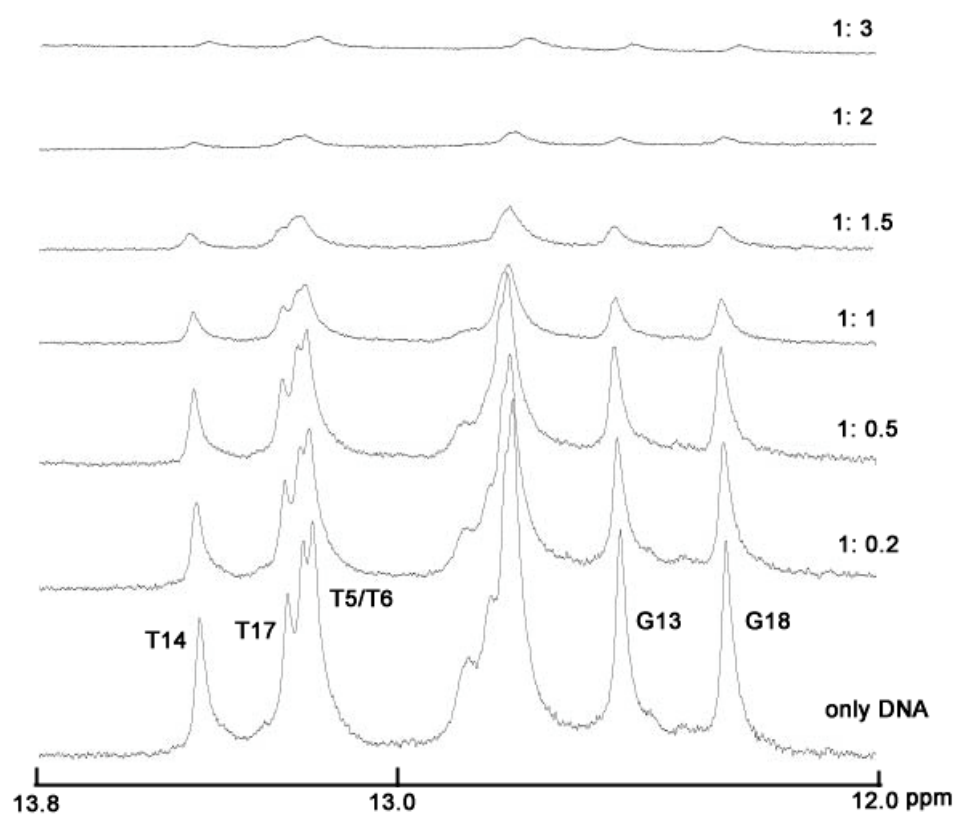

Supplement: nar_31_16_4747__1.pdf [file nar_31_16_4747__1.pdf]
